# Supplementary material for: Rotational isomerism and crystal structures of 2,2′-diphenyl-2,2′-bi-1,3-dithianyl and 2,2′-diphenyl-2,2′-bi-1,3-dioxolanyl †
Source: Royal Society of Chemistry journal article supplement (doi:10.1039/b003961f), 2000-01-01
Supplement: b003961f.doc [file b003961f.doc]

# Supplementary data

**Rotational isomerism and crystal structures of 2,2’-diphenyl-2,2’-bis(1,3-dithianyl) and 2,2’-diphenyl-2,2’-bis(1,3-dioxolanyl)**

**Yulin Lam*, Ming Wah Wong, Hsing-Hua Huang and Eping Liang**

*Department of Chemistry, National University of Singapore, 3 Science Drive 3, Singapore 117543. E-mail:* [*chmlamyl@nus.edu.sg*](mailto:chmlamyl@nus.edu.sg)

**Calculated B3-LYP/6-31G* IR spectra of *trans* and *gauche* forms of 3 and 4 and details of the crystal structure determinations of 1 and 2**

**Table S1** Calculated B3-LYP/6-31G* IR spectra of *trans* and *gauche* forms of **3** and **4**

––––––––––––––––––––––––––––––––––––––––––––––––––––––––––––––––––––––––

*trans* rotamer *gauche* rotamer

––––––––––––––––––––––––––––––– –––––––––––––––––––––––––––––––

Frequency*a*/cm-1 Intensity/kmmol-1 Frequencya/cm-1 Intensity/kmmol-1

––––––––––––––––––––––––––––––––––––––––––––––––––––––––––––––––––––––––

Compound **3**

2997 39 2998 23

2997 0 2998 13

2994 0 2995 4

2994 17 2995 14

2979 0 2980 10

2979 27 2980 17

2960 10 2947 7

2949 0 2941 2

2935 0 2932 36

2935 102 2932 74

2933 15 2928 12

2932 0 2928 4

2910 0 2911 5

2910 75 2910 63

1449 0 1447 4

1449 6 1447 1

1440 0 1438 6

1440 19 1438 15

1430 8 1430 2

1430 0 1430 6

1344 0 1344 0

1344 0 1344 0

1295 0 1296 1

1294 0 1296 0

1292 0 1283 1

1284 0 1281 88

1281 91 1255 17

1236 13 1241 0

1234 0 1230 27

1190 44 1213 7

1190 0 1188 9

1167 0 1181 26

1166 0 1167 0

1146 8 1166 0

1104 0 1102 1

1101 0 1098 1

1038 0 1031 8

1026 0 1025 0

1026 0 1024 0

991 4 994 2

978 0 981 0

893 20 897 18

890 0 890 1

854 6 854 6

848 0 844 3

833 0 816 0

806 4 807 1

774 0 760 12

691 0 734 22

689 25 667 6

650 11 652 0

649 0 641 10

638 15 626 0

627 0 624 7

611 2 585 4

468 0 537 2

458 0 454 0

391 2 443 0

340 0 333 0

322 2 322 3

312 1 311 1

305 0 310 0

301 0 294 0

267 1 292 1

241 0 204 0

186 0 165 0

167 1 164 0

155 0 159 0

107 2 138 1

101 0 65 3

46 4 59 3

40 1 44 1

Compound **4**

3010 45 3013 9

3010 21 3013 75

2997 9 2990 56

2997 67 2989 4

2916 218 2952 7

2914 14 2952 48

2908 37 2936 85

2905 2 2923 58

2902 116 2917 27

2894 0 2916 103

1491 0 1493 0

1491 2 1492 0

1480 0 1479 0

1480 1 1477 4

1407 0 1375 13

1350 3 1370 0

1347 0 1349 7

1345 12 1346 5

1336 10 1332 12

1294 36 1324 35

1277 22 1281 6

1262 4 1271 4

1211 31 1212 11

1211 0 1211 5

1189 4 1187 4

1189 1 1187 2

1153 0 1174 131

1127 228 1132 79

1114 0 1118 7

1107 394 1102 215

1062 7 1041 57

1045 64 1038 8

1034 16 1001 29

974 8 968 64

972 5 954 52

941 86 944 23

940 7 922 5

921 0 921 21

920 23 871 8

880 4 870 13

877 36 828 17

732 0 761 27

713 4 737 0

630 6 638 4

628 1 635 1

418 1 625 39

393 28 397 1

319 0 261 8

259 0 254 1

234 1 214 0

138 1 164 1

68 2 82 1

58 1 70 15

39 11 52 0

*a* Frequencies scaled by a factor of 0.9613.

**Crystal data and structure refinement for 2,2’-diphenyl-2,2’-bis(1,3-dithianyl) 1**

Empirical formula C20 H22 S4

Formula weight 390.62

Temperature 293(2) K

Wavelength 0.71073 Å

Crystal system Monoclinic

Space group P21/c

Unit cell dimensions a = 15.4890(3) Å a= 90°.

b = 7.7878(1) Å b= 101.341(1)°.

c = 15.7930(3) Å g = 90°.

Volume 1867.84(6) Å3

Z 4

Density (calculated) 1.389 Mg/m3

Absorption coefficient 0.508 mm-1

F(000) 824

Crystal size 0.33 x 0.25 x 0.23 mm3

Theta range for data collection 2.63 to 29.30°.

Index ranges -11<=h<=21, -10<=k<=10, -21<=l<=15

Reflections collected 11341

Independent reflections 4566 [R(int) = 0.0227]

Absorption correction Sadabs (Sheldrick, 1996)

Max. and min. transmission 0.9111 and 0.7940

Refinement method Full-matrix least-squares on F2

Data / restraints / parameters 4566 / 0 / 218

Goodness-of-fit on F2 1.045

Final R indices [I>2sigma(I)] R1 = 0.0484, wR2 = 0.1079

R indices (all data) R1 = 0.0630, wR2 = 0.1153

Extinction coefficient 0.0020(6)

Largest diff. peak and hole 1.011 and -0.891 e.Å-3

**Atomic coordinates (x104) and equivalent isotropic displacement coefficients (Å2 x 103) of 2,2’-diphenyl-2,2’-bis(1,3-dithianyl) 1. U(eq) is defined as one third of the trace of the orthogonalized Uij tensor**

________________________________________________________________________________

x y z U(eq)

________________________________________________________________________________

S(1) 19(1) 2725(1) 4631(1) 31(1)

S(2) 1264(1) 594(1) 5883(1) 36(1)

C(1) 407(1) 513(3) 4886(1) 24(1)

C(2) 761(1) -304(3) 4136(1) 27(1)

C(3) 1414(2) -1560(3) 4278(2) 35(1)

C(4) 1714(2) -2323(3) 3595(2) 45(1)

C(5) 1369(2) -1844(4) 2757(2) 51(1)

C(6) 730(2) -586(4) 2602(2) 47(1)

C(7) 426(2) 178(3) 3284(1) 35(1)

C(8) 1020(2) 3717(3) 4438(2) 37(1)

C(9) 1762(2) 3724(3) 5219(2) 45(1)

C(10) 2079(2) 1928(3) 5514(2) 41(1)

S(3) 4499(1) 3762(1) 6066(1) 56(1)

S(4) 4022(1) 7009(1) 5093(1) 60(1)

C(11) 4912(1) 5451(3) 5428(1) 31(1)

C(12) 5744(1) 6302(3) 5951(1) 31(1)

C(13) 5954(2) 8004(4) 5813(2) 47(1)

C(14) 6714(2) 8743(5) 6275(2) 64(1)

C(15) 7278(2) 7824(5) 6880(2) 70(1)

C(16) 7087(2) 6157(5) 7030(2) 63(1)

C(17) 6323(2) 5389(4) 6575(2) 45(1)

C(18) 4282(2) 5019(6) 6961(2) 74(1)

C(19) 3589(2) 6356(7) 6719(3) 89(2)

C(20) 3846(2) 7754(5) 6144(2) 79(1)

________________________________________________________________________________

**Bond lengths [Å] and angles [°] for 2,2’-diphenyl-2,2’-bis(1,3-dithianyl) 1** _____________________________________________________________________

S(1)-C(8) 1.811(2)

S(1)-C(1) 1.842(2)

S(2)-C(10) 1.817(2)

S(2)-C(1) 1.851(2)

C(1)-C(2) 1.538(3)

C(1)-C(1A) 1.592(4)

C(2)-C(3) 1.393(3)

C(2)-C(7) 1.395(3)

C(3)-C(4) 1.388(3)

C(4)-C(5) 1.378(4)

C(5)-C(6) 1.380(4)

C(6)-C(7) 1.391(3)

C(8)-C(9) 1.512(4)

C(9)-C(10) 1.525(4)

S(3)-C(18) 1.804(3)

S(3)-C(11) 1.846(2)

S(4)-C(20) 1.829(3)

S(4)-C(11) 1.834(2)

C(11)-C(12) 1.538(3)

C(11)-C(11A) 1.593(4)

C(12)-C(17) 1.390(3)

C(12)-C(13) 1.392(4)

C(13)-C(14) 1.382(4)

C(14)-C(15) 1.364(5)

C(15)-C(16) 1.362(5)

C(16)-C(17) 1.393(4)

C(18)-C(19) 1.490(6)

C(19)-C(20) 1.520(6)

C(8)-S(1)-C(1) 100.48(10)

C(10)-S(2)-C(1) 100.04(10)

C(2)-C(1)-C(1A) 112.6(2)

C(2)-C(1)-S(1) 111.67(13)

C(1A)-C(1)-S(1) 106.3(2)

C(2)-C(1)-S(2) 111.34(14)

C(1A)-C(1)-S(2) 107.0(2)

S(1)-C(1)-S(2) 107.65(10)

C(3)-C(2)-C(7) 117.7(2)

C(3)-C(2)-C(1) 121.6(2)

C(7)-C(2)-C(1) 120.7(2)

C(4)-C(3)-C(2) 121.3(2)

C(5)-C(4)-C(3) 120.3(2)

C(4)-C(5)-C(6) 119.5(2)

C(5)-C(6)-C(7) 120.4(3)

C(6)-C(7)-C(2) 120.9(2)

C(9)-C(8)-S(1) 113.8(2)

C(8)-C(9)-C(10) 113.2(2)

C(9)-C(10)-S(2) 114.8(2)

C(18)-S(3)-C(11) 100.33(15)

C(20)-S(4)-C(11) 100.71(14)

C(12)-C(11)-C(11A) 112.4(2)

C(12)-C(11)-S(4) 111.9(2)

C(11A)-C(11)-S(4) 106.9(2)

C(12)-C(11)-S(3) 110.94(15)

C(11A)-C(11)-S(3) 106.5(2)

S(4)-C(11)-S(3) 107.88(11)

C(17)-C(12)-C(13) 117.4(2)

C(17)-C(12)-C(11) 121.1(2)

C(13)-C(12)-C(11) 121.5(2)

C(14)-C(13)-C(12) 121.0(3)

C(15)-C(14)-C(13) 120.9(3)

C(16)-C(15)-C(14) 119.4(3)

C(15)-C(16)-C(17) 120.7(3)

C(12)-C(17)-C(16) 120.7(3)

C(19)-C(18)-S(3) 114.4(2)

C(18)-C(19)-C(20) 113.2(3)

C(19)-C(20)-S(4) 114.7(3)

_____________________________________________________________________

Symmetry transformations used to generate equivalent atoms:

#1 -x,-y,-z+1 #2 -x+1,-y+1,-z+1

**Anisotropic displacement parameters (Å2x 103) for 2,2’-diphenyl-2,2’-bis(1,3-dithianyl) 1. The anisotropic displacement factor exponent takes the form: -2p2[ h2 a*2U11 + ... + 2 h k a* b* U12 ]**

______________________________________________________________________________

U11 U22 U33 U23 U13 U12

______________________________________________________________________________

S(1) 33(1) 23(1) 39(1) 2(1) 12(1) 1(1)

S(2) 31(1) 45(1) 28(1) 3(1) -1(1) -9(1)

C(1) 25(1) 24(1) 23(1) 0(1) 3(1) -2(1)

C(2) 26(1) 25(1) 32(1) -3(1) 7(1) -4(1)

C(3) 31(1) 30(1) 46(1) 2(1) 12(1) -1(1)

C(4) 38(1) 32(1) 72(2) -13(1) 25(1) -2(1)

C(5) 48(2) 52(2) 59(2) -29(1) 27(1) -13(1)

C(6) 49(2) 60(2) 35(1) -15(1) 11(1) -12(1)

C(7) 34(1) 41(1) 30(1) -4(1) 6(1) -1(1)

C(8) 42(1) 28(1) 46(1) 1(1) 17(1) -8(1)

C(9) 43(1) 41(1) 53(2) -8(1) 15(1) -18(1)

C(10) 30(1) 50(2) 43(1) -2(1) 6(1) -12(1)

S(3) 65(1) 64(1) 41(1) -8(1) 22(1) -33(1)

S(4) 47(1) 72(1) 52(1) -18(1) -9(1) 27(1)

C(11) 28(1) 37(1) 28(1) -2(1) 4(1) -1(1)

C(12) 28(1) 36(1) 29(1) -5(1) 6(1) -3(1)

C(13) 60(2) 45(2) 37(1) -5(1) 14(1) -15(1)

C(14) 73(2) 70(2) 59(2) -28(2) 35(2) -41(2)

C(15) 37(2) 103(3) 73(2) -54(2) 21(2) -27(2)

C(16) 39(2) 91(3) 51(2) -33(2) -12(1) 16(2)

C(17) 43(1) 48(2) 39(1) -8(1) -4(1) 5(1)

C(18) 69(2) 116(3) 47(2) -27(2) 33(2) -42(2)

C(19) 58(2) 149(4) 70(2) -61(3) 36(2) -35(3)

C(20) 54(2) 100(3) 77(2) -50(2) -1(2) 24(2)

______________________________________________________________________________

**Hydrogen coordinates ( x 104) and isotropic displacement parameters (Å2x 10 3) for 2,2’-diphenyl-2,2’-bis(1,3-dithianyl) 1** ________________________________________________________________________________

x y z U(eq)

________________________________________________________________________________

H(3) 1653(2) -1894(3) 4840(2) 42

H(4) 2150(2) -3160(3) 3704(2) 54

H(5) 1565(2) -2365(4) 2300(2) 61

H(6) 501(2) -247(4) 2038(2) 57

H(7) -6(2) 1022(3) 3170(1) 42

H(8A) 1213(2) 3111(3) 3972(2) 45

H(8B) 891(2) 4892(3) 4251(2) 45

H(9A) 1565(2) 4304(3) 5691(2) 54

H(9B) 2252(2) 4372(3) 5084(2) 54

H(10A) 2588(2) 2034(3) 5979(2) 49

H(10B) 2269(2) 1350(3) 5038(2) 49

H(13) 5578(2) 8652(4) 5403(2) 56

H(14) 6841(2) 9882(5) 6173(2) 77

H(15) 7788(2) 8330(5) 7187(2) 83

H(16) 7471(2) 5525(5) 7440(2) 76

H(17) 6198(2) 4255(4) 6691(2) 54

H(18A) 4105(2) 4250(6) 7379(2) 89

H(18B) 4824(2) 5575(6) 7240(2) 89

H(19A) 3467(2) 6878(7) 7241(3) 107

H(19B) 3051(2) 5810(7) 6421(3) 107

H(20A) 4382(2) 8297(5) 6446(2) 95

H(20B) 3387(2) 8620(5) 6051(2) 95

________________________________________________________________________________

**Crystal data and structure refinement for 2,2’-diphenyl-2,2’-bis(1,3-dioxolanyl) 2**

Empirical formula C18 H18 O4

Formula weight 298.32

Temperature 296(2) K

Wavelength 0.71073 Å

Crystal system Monoclinic

Space group P2(1)/n

Unit cell dimensions a = 6.0592(3) Å a= 90°.

b = 6.9442(4) Å b= 94.023(1)°.

c = 17.666(1) Å g = 90°.

Volume 741.50(7) Å3

Z 2

Density (calculated) 1.336 Mg/m3

Absorption coefficient 0.094 mm-1

F(000) 316

Crystal size 0.40 x 0.37 x 0.15 mm3

Theta range for data collection 2.31 to 28.97°.

Index ranges -7<=h<=8, -9<=k<=6, -24<=l<=23

Reflections collected 4412

Independent reflections 1789 [R(int) = 0.0167]

Absorption correction SADABS (Sheldrick, 1996)

Max. and min. transmission 0.9778 and 0.7594

Refinement method Full-matrix least-squares on F2

Data / restraints / parameters 1789 / 0 / 101

Goodness-of-fit on F2 1.059

Final R indices [I>2sigma(I)] R1 = 0.0389, wR2 = 0.0956

R indices (all data) R1 = 0.0526, wR2 = 0.1021

Extinction coefficient 0.0075(38)

Largest diff. peak and hole 0.191 and -0.156 e.Å-3

**Atomic coordinates (x104) and equivalent isotropic displacement coefficients (Å2 x 103) of 2,2’-diphenyl-2,2’-bis(1,3-dioxolanyl) 2. U(eq) is defined as one third of the trace of the orthogonalized Uij tensor**

________________________________________________________________________________

x y z U(eq)

________________________________________________________________________________

O(1) 2556(1) 1462(1) 80(1) 43(1)

O(2) 6049(2) 2049(1) 552(1) 42(1)

C(1) 4551(2) 542(2) 340(1) 34(1)

C(2) 2426(3) 3197(2) 518(1) 58(1)

C(3) 4716(3) 3468(2) 898(1) 54(1)

C(4) 4192(2) -783(2) 1014(1) 35(1)

C(5) 2162(2) -1676(2) 1079(1) 44(1)

C(6) 1836(3) -2848(2) 1702(1) 53(1)

C(7) 3508(3) -3117(2) 2259(1) 58(1)

C(8) 5530(3) -2237(2) 2199(1) 56(1)

C(9) 5887(2) -1075(2) 1575(1) 45(1)

________________________________________________________________________________

**Bond lengths [Å] and angles [°] for 2,2’-diphenyl-2,2’-bis(1,3-dioxolanyl) 2** ________________________________________________________________________

O(1)-C(1) 1.4152(14)

O(1)-C(2) 1.437(2)

O(2)-C(1) 1.4185(15)

O(2)-C(3) 1.438(2)

C(1)-C(4) 1.532(2)

C(1)-C(1A) 1.549(2)

C(2)-C(3) 1.510(2)

C(4)-C(5) 1.389(2)

C(4)-C(9) 1.391(2)

C(5)-C(6) 1.394(2)

C(6)-C(7) 1.374(2)

C(7)-C(8) 1.380(2)

C(8)-C(9) 1.395(2)

C(1)-O(1)-C(2) 106.31(10)

C(1)-O(2)-C(3) 104.46(10)

O(1)-C(1)-O(2) 105.58(9)

O(1)-C(1)-C(4) 111.06(9)

O(2)-C(1)-C(4) 111.22(9)

O(1)-C(1)-C(1A) 107.77(11)

O(2)-C(1)-C(1A) 108.01(12)

C(4)-C(1)-C(1A) 112.86(12)

O(1)-C(2)-C(3) 105.14(11)

O(2)-C(3)-C(2) 104.51(11)

C(5)-C(4)-C(9) 119.32(12)

C(5)-C(4)-C(1) 120.47(11)

C(9)-C(4)-C(1) 120.20(11)

C(4)-C(5)-C(6) 120.08(13)

C(7)-C(6)-C(5) 120.41(14)

C(6)-C(7)-C(8) 119.92(14)

C(7)-C(8)-C(9) 120.30(14)

C(4)-C(9)-C(8) 119.96(14)

_____________________________________________________________

Symmetry transformations used to generate equivalent atoms:

#1 -x+1,-y,-z

**Anisotropic displacement parameters (Å2x 103) for 2,2’-diphenyl-2,2’-bis(1,3-dioxolanyl) 2. The anisotropic displacement factor exponent takes the form: -2p2[ h2 a*2U11 + ... + 2 h k a* b* U12 ]**

______________________________________________________________________________

U11 U22 U33 U23 U13 U12

______________________________________________________________________________

O(1) 44(1) 47(1) 39(1) -2(1) 0(1) 16(1)

O(2) 49(1) 37(1) 40(1) -9(1) 6(1) -4(1)

C(1) 35(1) 35(1) 33(1) -4(1) 0(1) 4(1)

C(2) 67(1) 46(1) 61(1) -5(1) 14(1) 18(1)

C(3) 78(1) 38(1) 47(1) -9(1) 11(1) 6(1)

C(4) 42(1) 35(1) 30(1) -4(1) 5(1) 4(1)

C(5) 45(1) 44(1) 42(1) -5(1) 7(1) 1(1)

C(6) 63(1) 42(1) 57(1) -3(1) 26(1) -3(1)

C(7) 92(1) 41(1) 43(1) 6(1) 23(1) 9(1)

C(8) 78(1) 54(1) 35(1) 4(1) -3(1) 14(1)

C(9) 51(1) 46(1) 37(1) 0(1) -2(1) 3(1)

______________________________________________________________________________

**Hydrogen coordinates ( x 104) and isotropic displacement parameters (Å2x 10 3) for 2,2’-diphenyl-2,2’-bis(1,3-dioxolanyl) 2** ________________________________________________________________________________

x y z U(eq)

________________________________________________________________________________

H(2A) 1341(3) 3065(2) 893(1) 69

H(2B) 2020(3) 4283(2) 192(1) 69

H(3A) 5261(3) 4757(2) 810(1) 65

H(3B) 4714(3) 3255(2) 1441(1) 65

H(5) 1019(2) -1491(2) 707(1) 52

H(6) 479(3) -3452(2) 1742(1) 64

H(7) 3277(3) -3891(2) 2675(1) 69

H(8) 6660(3) -2420(2) 2576(1) 67

H(9) 7257(2) -497(2) 1534(1) 54

________________________________________________________________________________
